# Supplementary material for: New theropod dinosaur from the Lower Cretaceous of Japan provides critical implications for the early evolution of ornithomimosaurs
Source: PubMed Central journal article supplement (PMC10484975; doi:10.1038/s41598-023-40804-3), 2023-09-07
Supplement: 41598_2023_40804_MOESM1_ESM.pdf [file 41598_2023_40804_MOESM1_ESM.pdf]

## **Supplementary Information**

**New theropod dinosaur from the Lower Cretaceous of Japan provides critical implications for the early evolution of ornithomimosaur**

Soki Hattori, Masateru Shibata, Soichiro Kawabe, Takuya Imai, Hiroshi Nishi,  
Yoichi Azuma

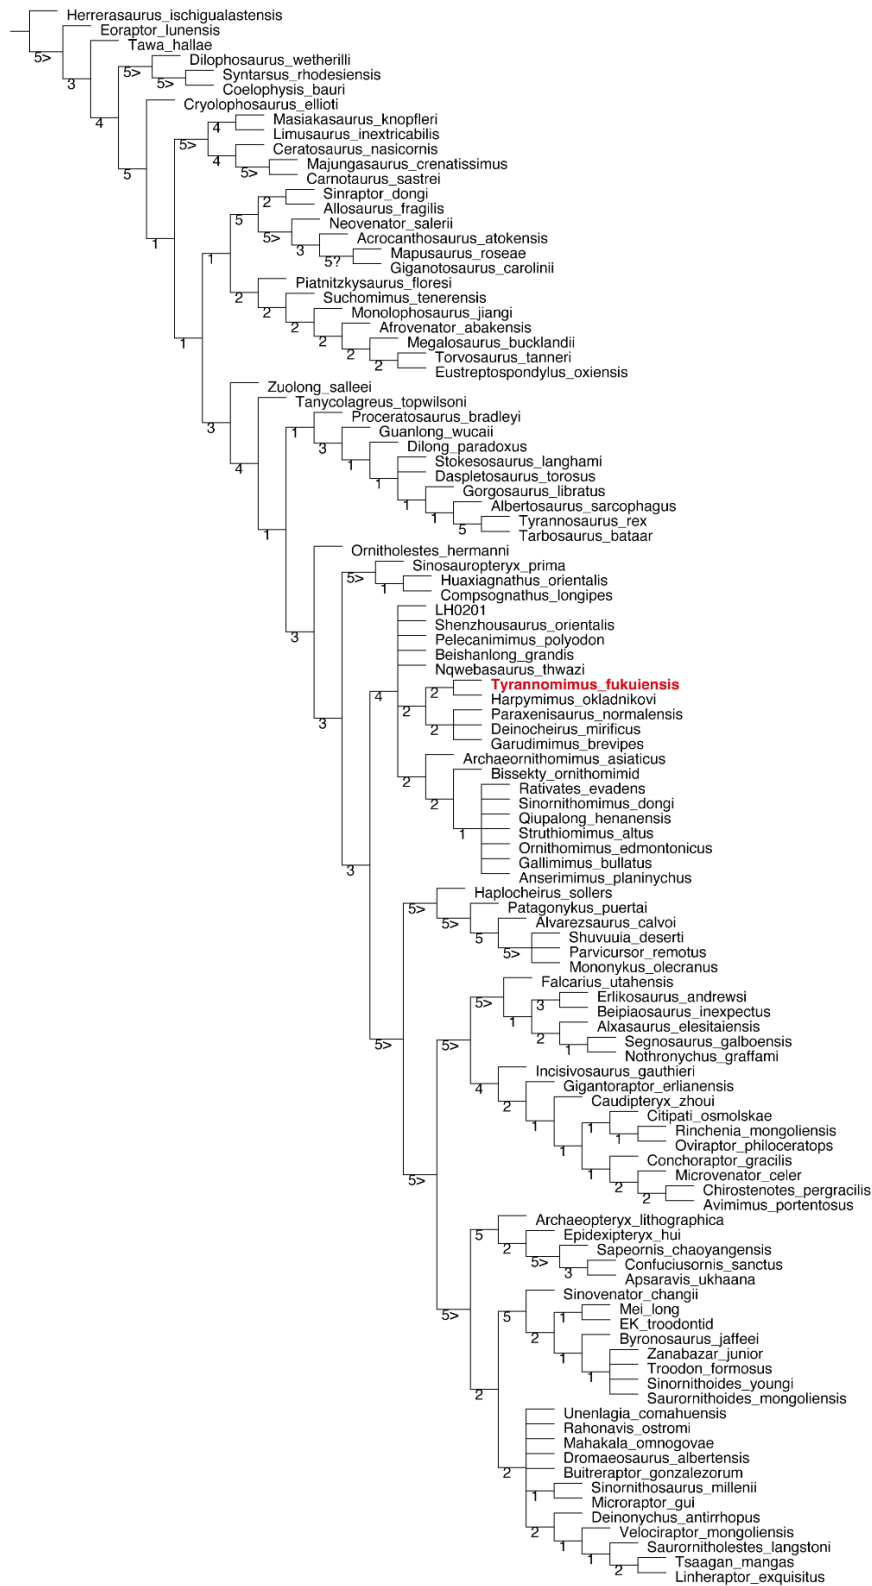

**Figure S1.** Strict consensus tree of 2640 MPTs with a length of 3016 steps (CI = 0.217; RI = 0.608) resulted by the phylogenetic analysis conducted in the present study. Numbers associated with nodes represent Bremer support values.

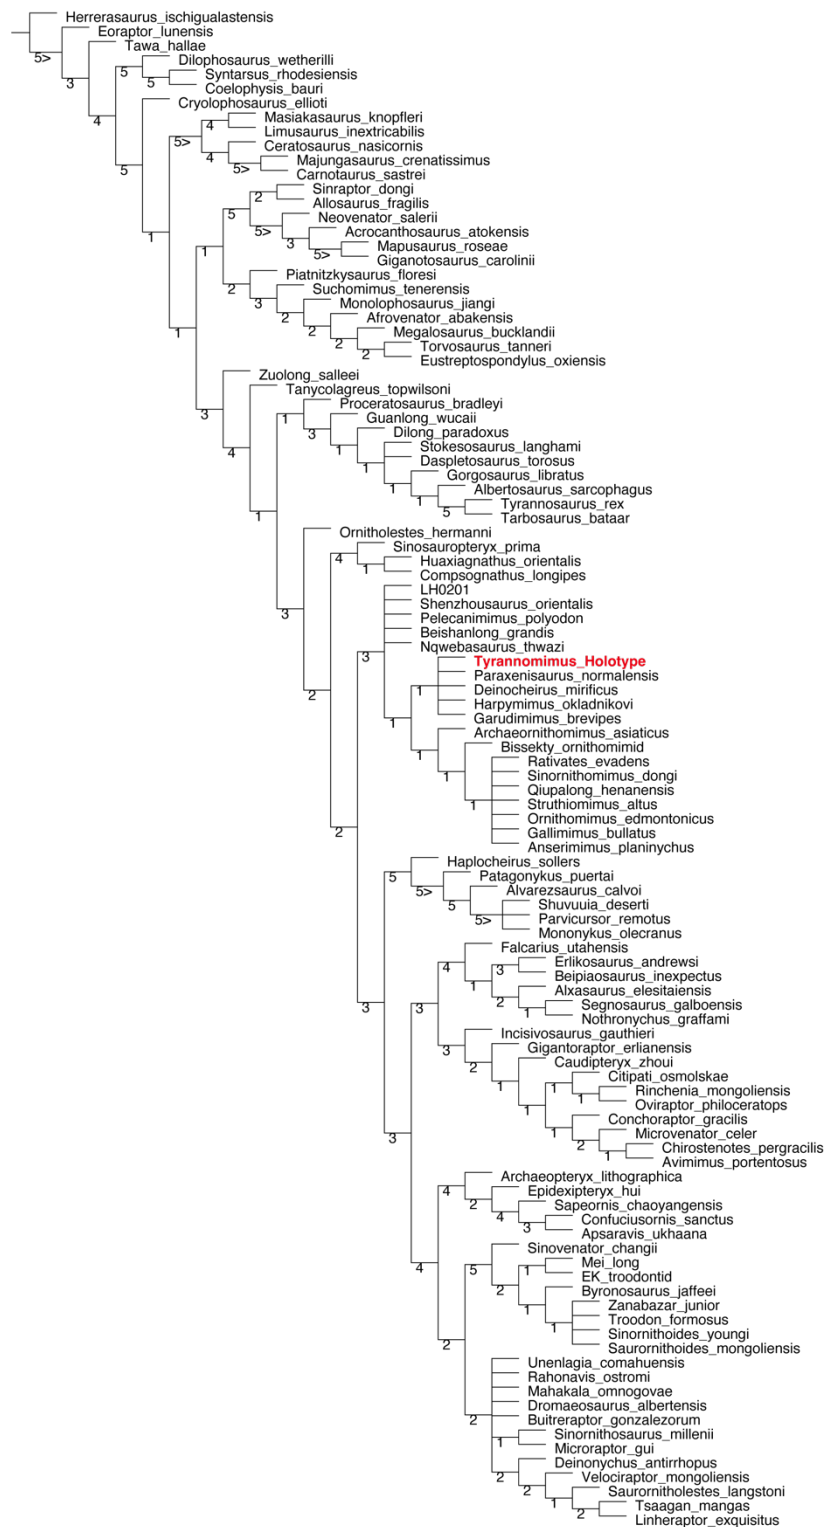

**Figure S2.** Strict consensus tree of 5280 MPTs with a length of 3007 steps (CI = 0.219; RI = 0.610) resulted by the phylogenetic analysis conducted with *Tyrannomimus fukuiensis* scored from the holotype alone. Numbers associated with nodes represent Bremer support values.

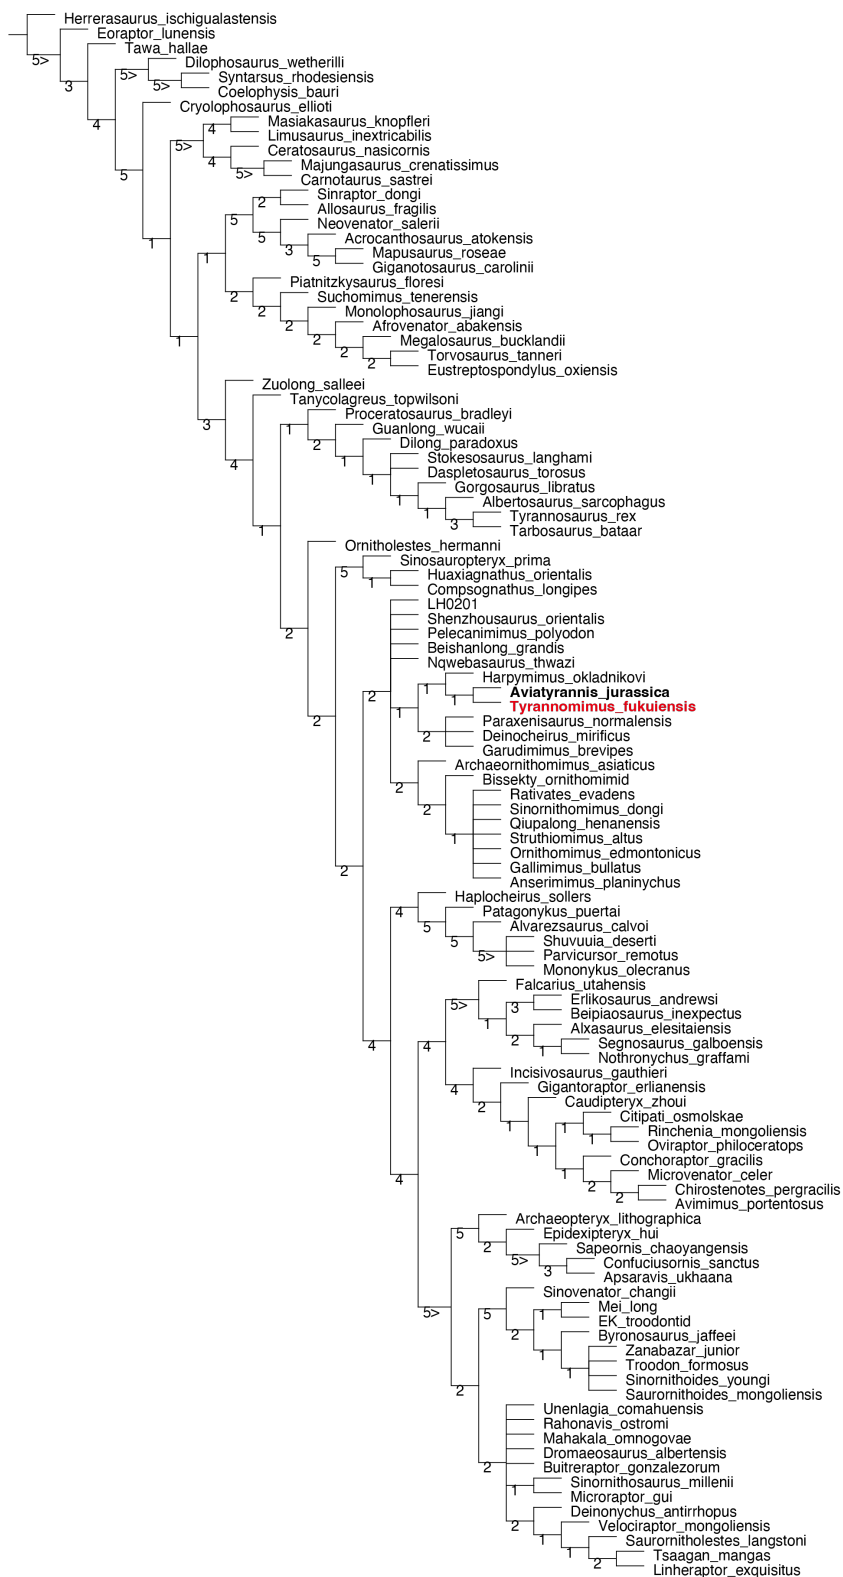

**Figure S3.** Strict consensus tree of 2640 MPTs with a length of 3019 steps (CI = 0.217; RI = 0.608) resulted by the phylogenetic analysis conducted with *Aviatyrannis jurassica* being added. Numbers associated with nodes represent Bremer support values.

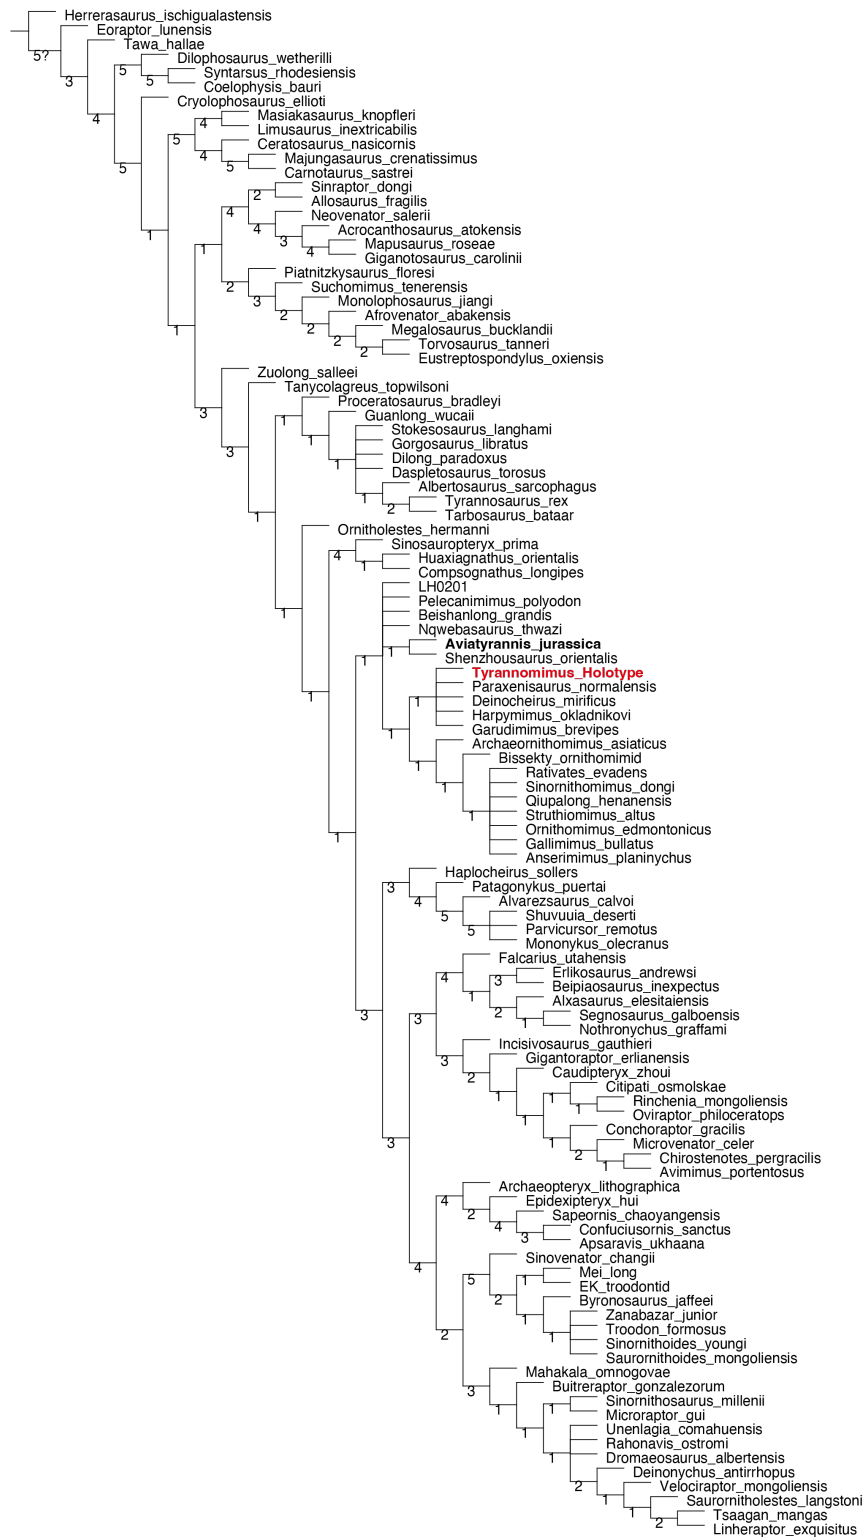

**Figure S4.** Strict consensus tree of 7920 MPTs with a length of 3011 steps (CI = 0.216; RI = 0.606) resulted by the analysis conducted with *Tyrannomimus fukuiensis* scored from the holotype alone and *Aviatyrannis jurassica* being added. Numbers associated with nodes represent Bremer support values.
